# Supplementary material for: Structural Characterization of the Reaction and Substrate Specificity Mechanisms of Pathogenic Fungal Acetyl-CoA Synthetases
Source: PubMed Central journal article supplement (PMC8383264; doi:10.1021/acschembio.1c00484), 2021-08-09
Supplement: cb1c00484_si_001.pdf [file cb1c00484_si_001.pdf]

**Structural characterization of the reaction and substrate specificity mechanisms of pathogenic fungal acetyl-CoA synthetases.**

Andrew J. Jezewski<sup>1</sup>, Katy M. Alden<sup>1</sup>, Taiwo E. Esan<sup>2</sup>, Nicholas D. DeBouver<sup>3,5</sup>, Jan Abendroth<sup>3,5</sup>, Jameson C. Bullen<sup>3,5</sup>, Brandy M. Calhoun<sup>3,5</sup>, Kristy T. Potts<sup>3,4</sup>, Daniel M. Murante<sup>1</sup>, Timothy J. Hagen<sup>2</sup>, David Fox<sup>3,4,5</sup>, and Damian J. Krysan<sup>\*1,6</sup>

<sup>1</sup>Department of Pediatrics Carver College of Medicine, University of Iowa, Iowa City, IA 52242

<sup>2</sup>Department of Chemistry and Biochemistry, Northern Illinois University, DeKalb, IL 60115

<sup>3</sup>UCB Pharma., 7869 NE Day Road West, Bainbridge Island, WA 98110

<sup>4</sup>Beryllium Discovery Corp., 7869 NE Day Road West, Bainbridge Island, WA 98110

<sup>5</sup>Seattle Structural Genomics Center for Infectious Disease (SSGCID), Seattle, WA, 98109

<sup>6</sup>Microbiology/Immunology, Carver College of Medicine, University of Iowa, Iowa City, IA 52242

Running title: Substrate specificity of acetyl-CoA synthetases

Corresponding Author:

Damian J. Krysan

2040 Med Labs 25 S. Grand Avenue, Department of Pediatrics and Microbiology/Immunology,  
Carver College of Medicine, University of Iowa, Iowa City Iowa 52242, Phone: 319-335-3066,  
[damian-krysan@uiowa.edu](mailto:damian-krysan@uiowa.edu)

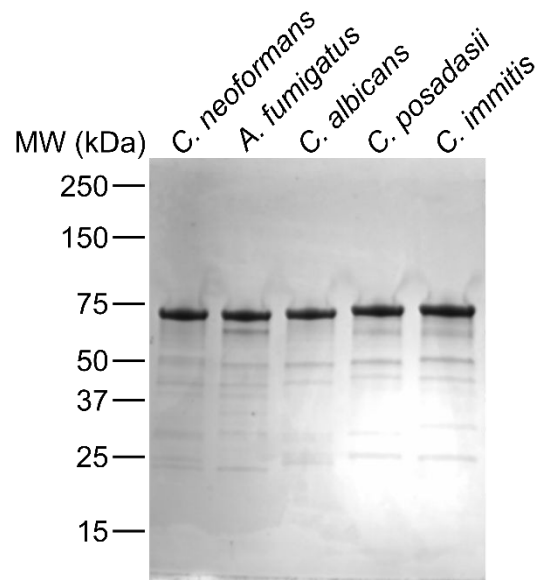

**Supplemental Figure 1. Recombinantly expressed and purified Acs1 proteins.** Coomassie gel represents 2ug of loaded purified proteins with dominant bands representing >95% purity.

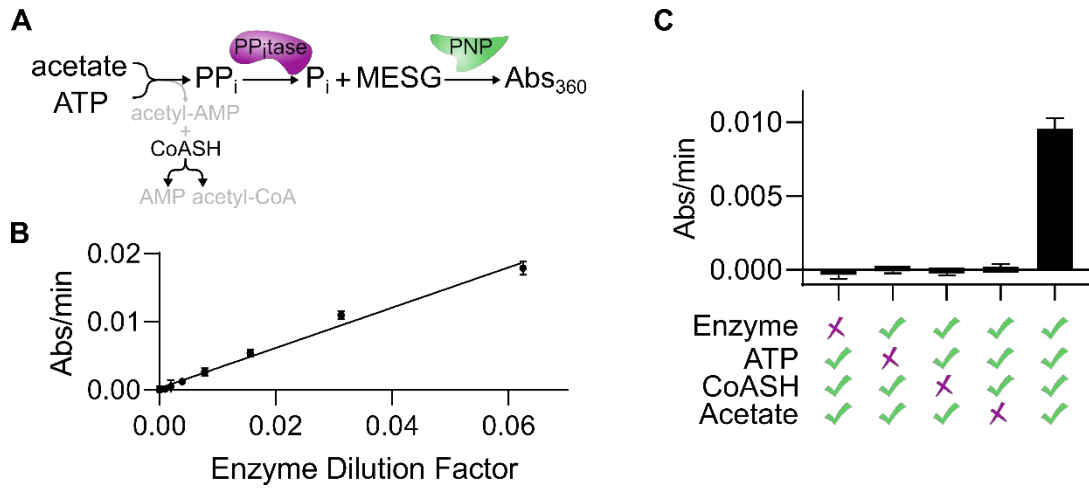

**Supplemental Figure 2. ACS activity assay validation.** (A) Schematic of ACS activity coupled to accessory enzyme detection of pyrophosphate (PPi) production. (B) Representative enzyme dilution curve to assure activity is measured within the linear range of enzyme content. (C) Detected activity is enzyme and substrate dependent.

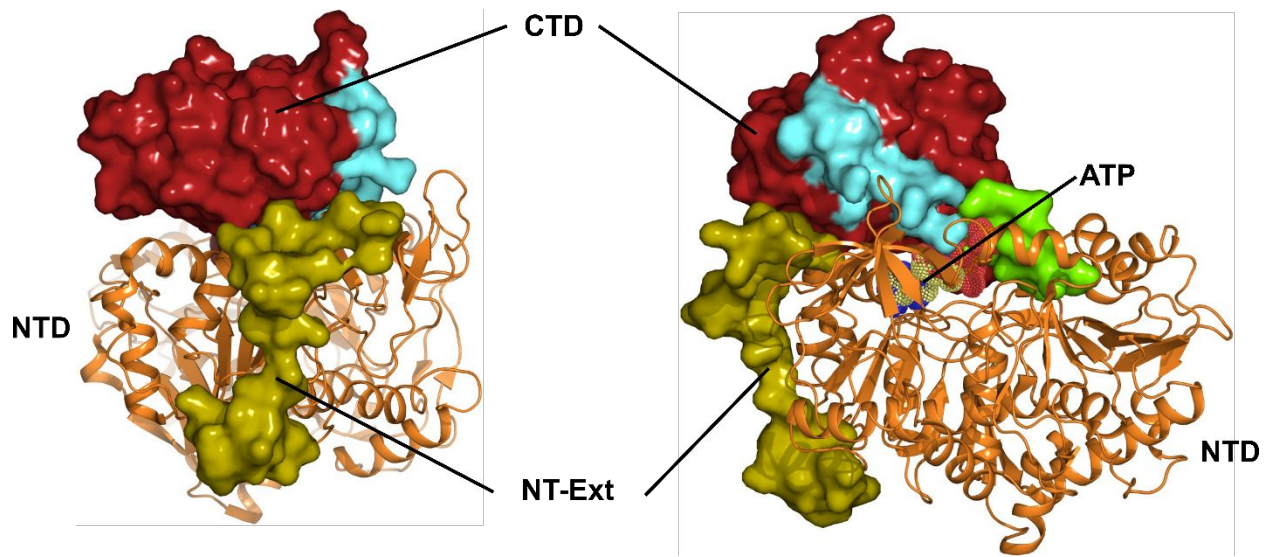

**Supplementary Figure 3. N-terminal Extension (NT-Ext) from *Cryptococcus neoformans* Acs1.** The ATP bound state (PDB 5K8F) is displayed with surfaces shown for NT-Ext (olive green), C-terminal domain (CTD, dark red), ATP binding loop (chartreuse) and hinge region (cyan). N-terminal domain (NTD) is shown in orange cartoon and ATP (yellow mesh).

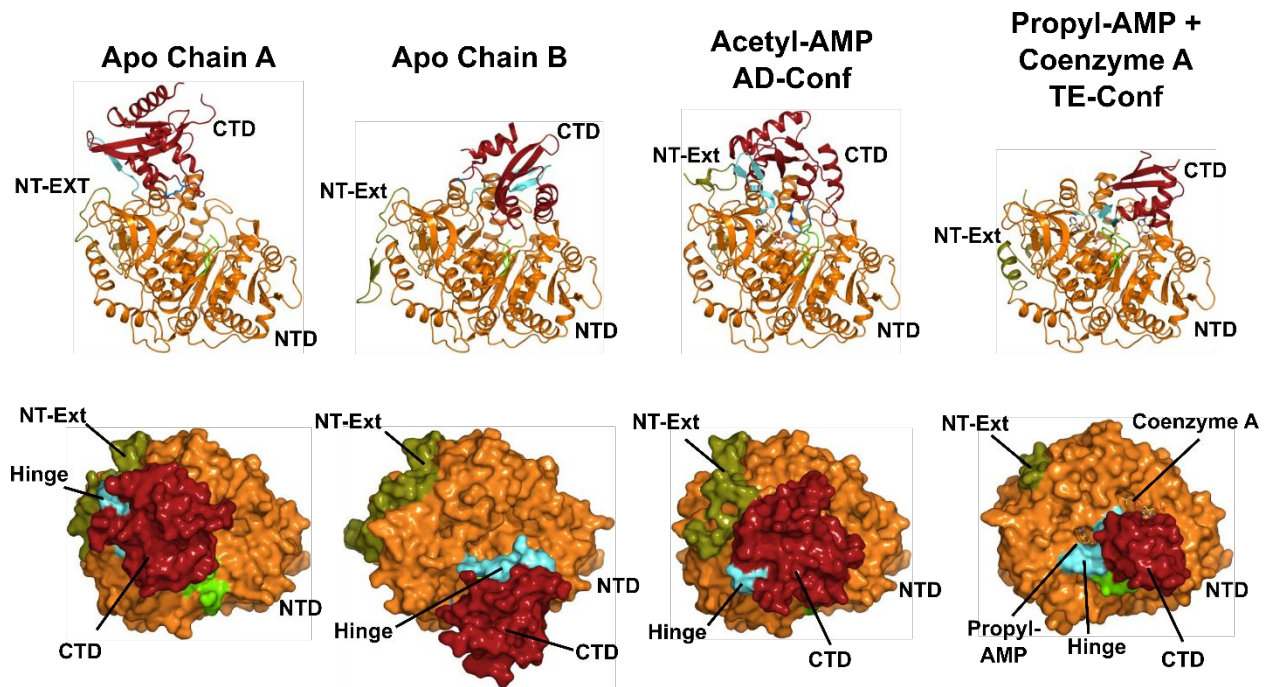

**Supplemental Figure 4. Conformational orientations of the C-terminal Domain of *Cryptococcus neoformans* Acs1.** (A-B) Apo (PDB 5PVP), (C) acetylating-conformation (AD-conf) bound to Acetyl-AMP (PDB 74LG) and (D) thioesterification conformation (TE-conf) bound to Propyl-AMP and Coenzyme A (PDB 5K85). N-terminal domain (NTD, orange), C-terminal domain (CTD, dark red), N-terminal extension (NT-Ext, olive green), hinge (cyan), and ATP binding loop (Chartreuse).

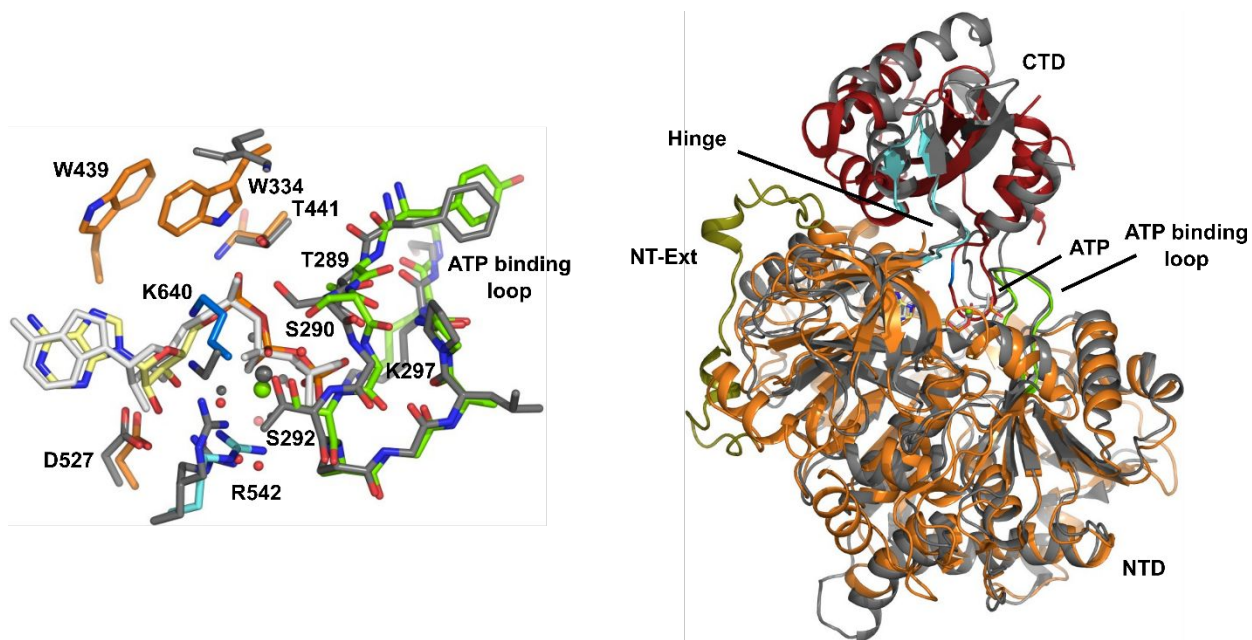

**Supplemental Figure 5. Comparison of Human ACSM2A and *Cryptococcus neoformans* Acs1 bound to ATP and Magnesium.** Human ACSM2A (PDB 3C5E) is shown in gray (cartoon) and light gray (compound). *Cryptococcus neoformans* Acs1 is shown in orange (N-terminal domain, NTD), dark red (C-terminal domain, CTD), olive green (N-terminal extension, NT-Ext), chartreuse (ATP binding loop), yellow (ATP), cyan (hinge), and blue (Active site Lys640). Right, overlay of N-terminal domain in PyMol shown in cartoon with (left) active site shown in stick. Residue numbering shown for *Cryptococcus neoformans* Acs1.

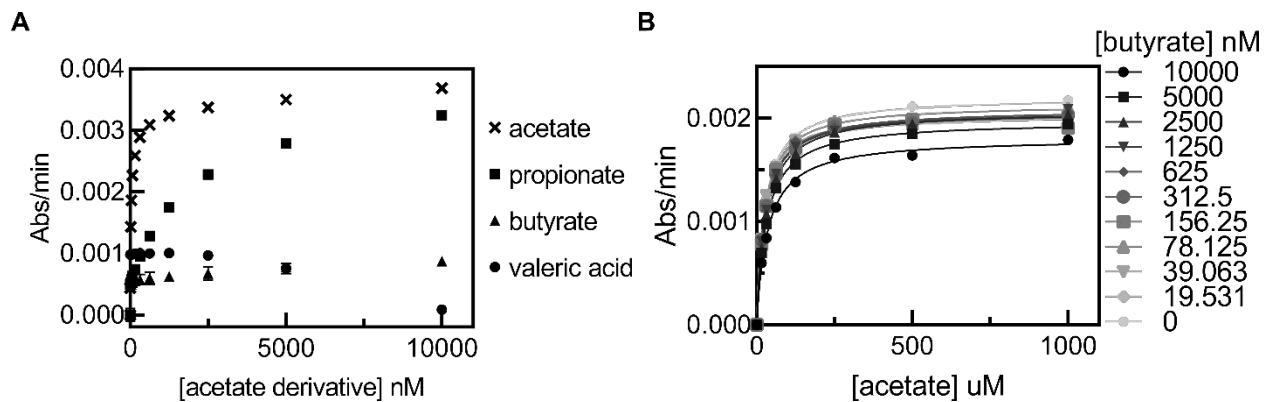

**Supplemental Figure 6. Utilization of alternative acid substrates.** (A) Activity of *CnAcs1* against alternative acid substrates. (B) The non-preferred acid substrate butyrate does not inhibit acetate utilization.

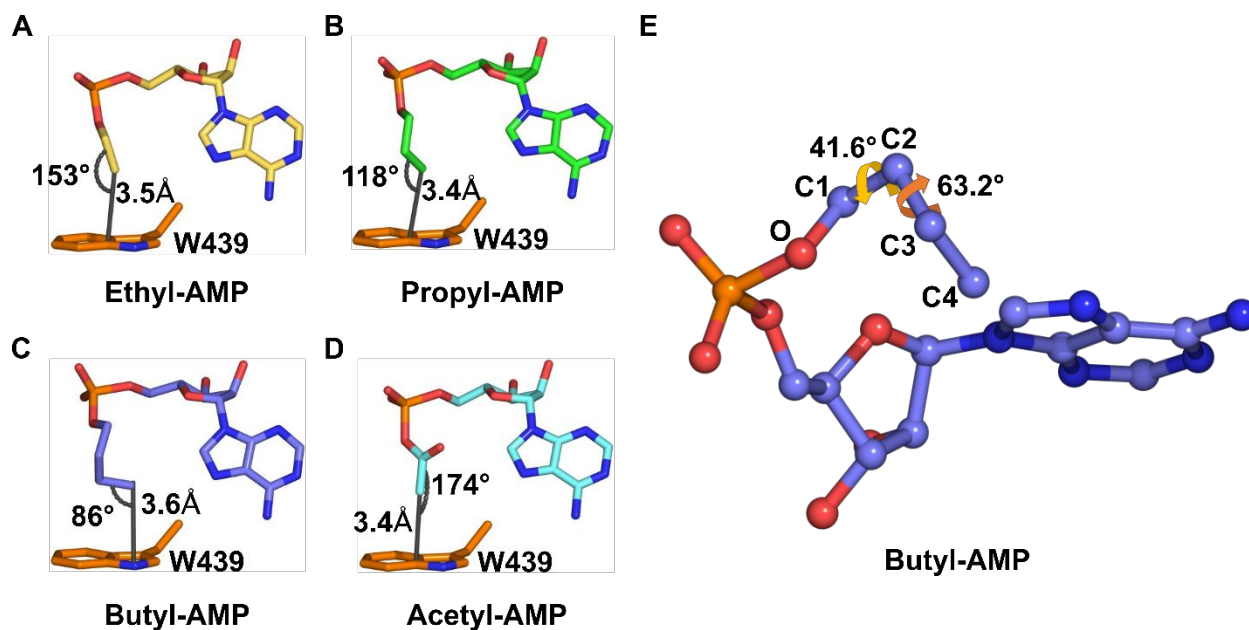

**Supplemental Figure 7. Angle and distances from terminal methyl to Trp439 sidechain in *Cryptococcus neoformans* AD-conformation.** (A) Ethyl-AMP (PDB 7NKO, Chain A), (B) Propyl-AMP (PDB 5IFI, Chain A), (C) Butyl-AMP (PDB 7KNP, Chain A), and (D) Acetyl AMP (PDB 74LG, Chain A). Angles were measured from the two carbon atoms nearest Trp439 (central atom always as the terminal carbon) and nearest atom on Trp439 side-chain (Ethyl, propyl, and acetyl = Cε2; Butyl = Nε1). Distances measured from terminal carbon atom and center of Trp439 ring (Ethyl, propyl and acetyl = center of both rings; Butyl = 5-membered ring only). (E) Dihedral angles measured for butyl AMP (PDB 7KNP) for O-C1-C2-C3 (yellow arrow) and C1-C2-C3-C4 (orange arrow).



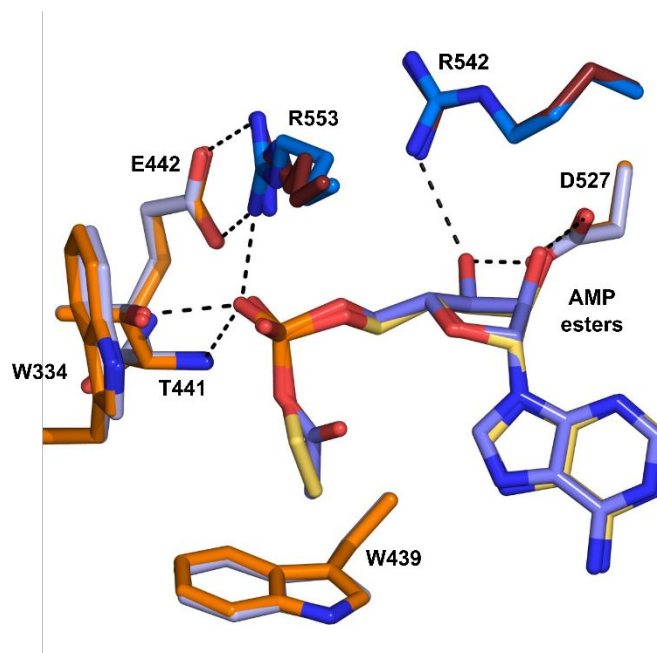

**Supplemental Figure 8. Comparison of ethyl-AMP and acetyl-AMP bound to *Cryptococcus neoformans* Acs1.** Overlay of ethyl-AMP (PDB 7KNO, compound – yellow, protein – orange) and acetyl-AMP (PDB 74LG, compound – blue, protein – light blue).

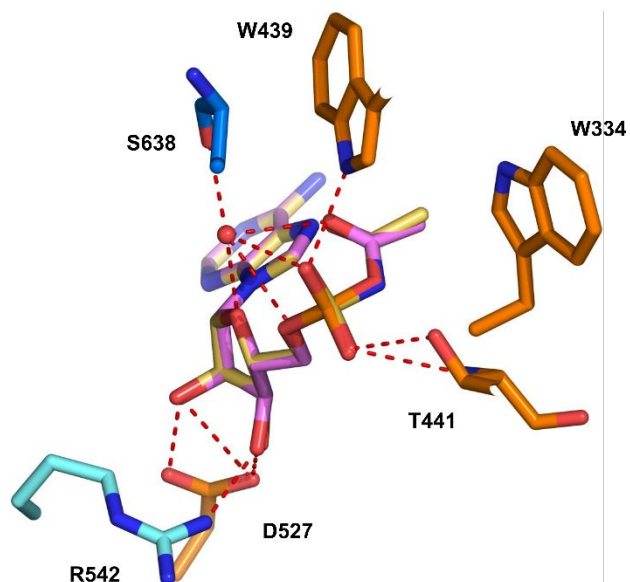

*Cryptococcus neoformans*  
(AD-conf, Acetyl-AMS vs Acetyl-AMP)

**Supplemental Figure 9. Overlay of Acetyl-AMP and Acetyl-AMS crystal structures.** Acetyl-AMP (PDB 74LG) and Acetyl-AMS (PDB 5U29) structures were overlaid in PyMol. Compounds are shown in stick representation with Acetyl-AMP in yellow and Acetyl-AMS in pink. Acetyl-AMS residues are shown surrounding the compound.

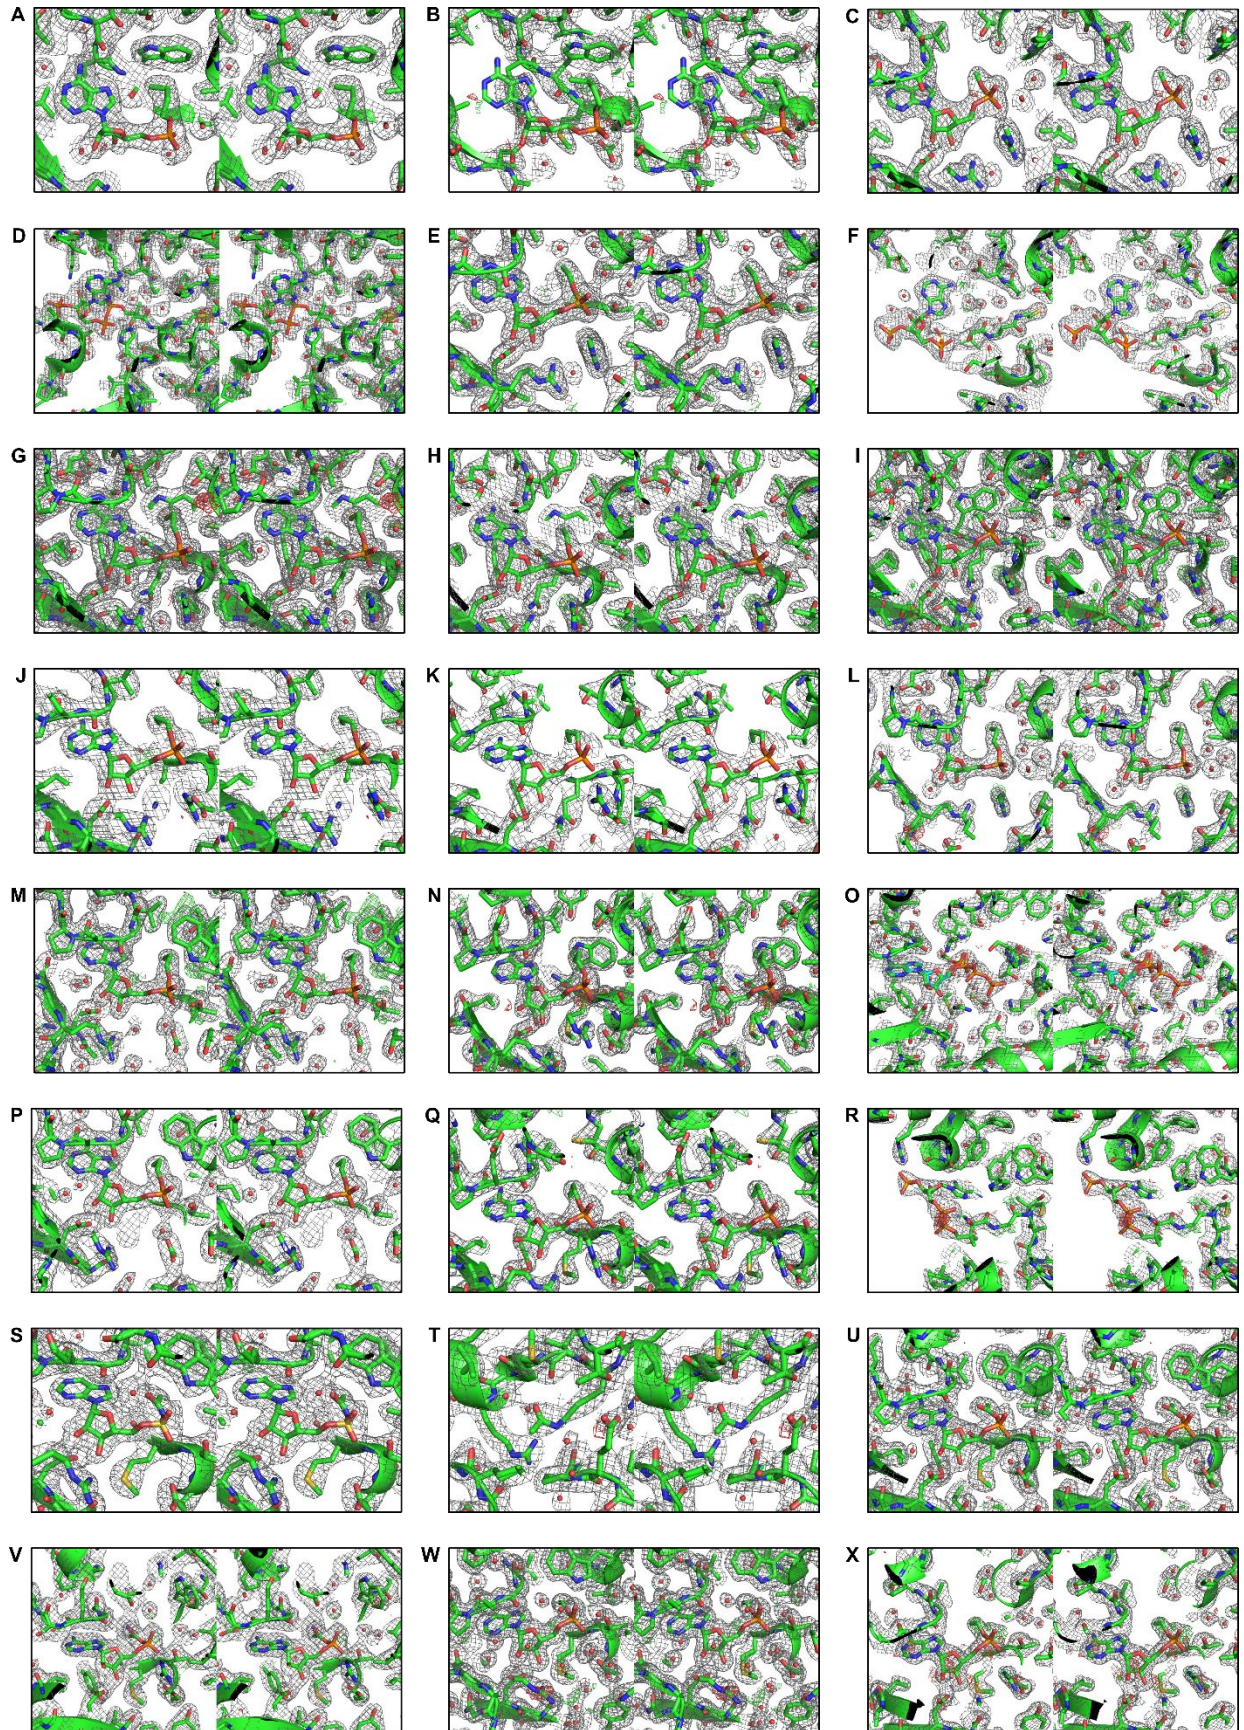

**Supplemental Figure 10. Stereo images of substrate binding pockets for fungal Acs1 crystal structures.** *Cryptococcus neoformans* + butyl AMP (PDB 7KNP), (A) Chain A (AD conformation) and (B) Chain C (TE conformation). *Coccidioides immitis* + methyl AMP + coenzyme A (PDB 7L3Q), (C) Chain A, methyl AMP (TE conformation), and (D) Chain A, coenzyme A (TE conformation). *Coccidioides immitis* + ethyl AMP + coenzyme A (PDB 7KVY), (E) Chain A, ethyl AMP (TE conformation), and (F) Chain A, coenzyme A (TE conformation). *Coccidioides immitis* + propyl AMP (PDB 7KQ6), (G) Chain A (TE conformation). *Coccidioides immitis* + ethyl AMP (PDB 7KQZ), (H) Chain A (TE conformation). *Coccidioides immitis* + methyl AMP (PDB 7L3P), (I) Chain A (TE conformation). *Aspergillus fumigatus* + propyl AMP (PDB 7KDN), (J) Chain A (TE conformation). *Candida albicans* + propyl AMP (PDB 7KDS), (K) Chain A (TE conformation). *Coccidioides posadasii* + propyl AMP (PDB 7KCP), (L) Chain A (TE conformation). *Cryptococcus neoformans* + propyl AMP (PDB 5IFI), (M) Chain A (AD conformation) and (N) Chain C (TE conformation). *Cryptococcus neoformans* + ATP/acetyl AMP (PDB 5K8F), (O) Chain A (AD conformation). *Cryptococcus neoformans* + propyl AMP + coenzyme A (PDB 5K85), (P) Chain A (AD conformation) and (Q) Chain C, propyl AMP (TE conformation), and (R) Chain C, coenzyme A (TE conformation). *Cryptococcus neoformans* + acetyl AMS (PDB 5U29), (S) Chain A (AD conformation). *Cryptococcus neoformans* + acetyl lysine (PDB 5VPV), (T) Chain A. *Cryptococcus neoformans* + acetyl AMP (PDB 74LG), (U) Chain A (AD conformation) and (V) Chain C (TE conformation). *Cryptococcus neoformans* + ethyl AMP (PDB 7KNO), (W) Chain A (AD conformation) and (X) Chain C (TE conformation). 2Fo-Fc maps contoured at  $1.0\sigma$  (grey), Fo-Fc maps contoured at  $+3.0/-3.0$  (green/red). Stereo images generated in PyMol.

| Supplemental Table 1. Crystallographic data and refinement statistics |                                                          |                                                              |                                                              |                   |                 |  |
|-----------------------------------------------------------------------|----------------------------------------------------------|--------------------------------------------------------------|--------------------------------------------------------------|-------------------|-----------------|--|
| Data name                                                             | <i>Cryptococcus neoformans</i><br>Propyl-AMP<br>PDB 5IFI | <i>Cryptococcus neoformans</i><br>ATP/Acetyl-AMP<br>PDB 5K8F | <i>Cryptococcus neoformans</i><br>Propyl-AMP/CoA<br>PDB 5K85 |                   |                 |  |
| <b>Data collection</b>                                                |                                                          |                                                              |                                                              |                   |                 |  |
| Wavelength (Å)                                                        | 0.9787                                                   | 0.9786                                                       | 0.9786                                                       |                   |                 |  |
| Space group                                                           | P 1 2 <sub>1</sub> 1                                     | P 1                                                          | P 1 2 <sub>1</sub> 1                                         |                   |                 |  |
| Cell dimensions                                                       |                                                          |                                                              |                                                              |                   |                 |  |
| a, b, c (Å)                                                           | 72.46 185.55 84.89                                       | 71.37 83.92 101.57                                           | 72.8 186.09 85.32                                            |                   |                 |  |
| α, β, γ (°)                                                           | 90.0 93.7 90.0                                           | 110.1 105.2 87.6                                             | 90.0 93.8 90.0                                               |                   |                 |  |
| Resolution (Å)                                                        | 50 - 1.95 (2.00 - 1.95) <sup>a</sup>                     | 50 - 2.45 (2.51 - 2.45)                                      | 50 - 2.30 (2.36 - 2.30)                                      |                   |                 |  |
| No. of unique reflections                                             | 159,980 (11,779)                                         | 77,299 (5,646)                                               | 97,753 (7,375)                                               |                   |                 |  |
| R <sub>merge</sub> (%)                                                | 5.8 (53.5)                                               | 7.6 (51.7)                                                   | 7.2 (54.9)                                                   |                   |                 |  |
| I/σ(I)                                                                | 14.96 (2.47)                                             | 14.19 (2.56)                                                 | 12.14 (2.01)                                                 |                   |                 |  |
| Completeness (%)                                                      | 98.7 (98.5)                                              | 98.5 (97.8)                                                  | 97.5 (99.2)                                                  |                   |                 |  |
| Redundancy                                                            | 3.8 (3.9)                                                | 4.0 (4.0)                                                    | 3.3 (3.2)                                                    |                   |                 |  |
| CC <sub>1/2</sub>                                                     | 99.8 (84.3)                                              | 99.8 (86.1)                                                  | 99.7 (77.1)                                                  |                   |                 |  |
| <b>Refinement</b>                                                     |                                                          |                                                              |                                                              |                   |                 |  |
| Resolution (Å)                                                        | 50 - 1.95                                                | 50 - 2.45                                                    | 50 - 2.30                                                    |                   |                 |  |
| No. of unique reflections                                             | 159,842                                                  | 77,260                                                       | 97,663                                                       |                   |                 |  |
| R <sub>work</sub> /R <sub>free</sub> <sup>b</sup>                     | 0.185 (0.251)<br>0.213 (0.280)                           | 0.188 (0.260)<br>0.224 (0.278)                               | 0.179 (0.258)<br>0.217 (0.285)                               |                   |                 |  |
| No. of atoms                                                          |                                                          |                                                              |                                                              |                   |                 |  |
| Protein                                                               | 14,242                                                   | 15,031                                                       | 14,624                                                       |                   |                 |  |
| Ligand                                                                | 78                                                       | ATP 93<br>Acetyl AMP 78                                      | 93<br>78                                                     | Propyl AMP<br>CoA | 78<br>48        |  |
| Solvent                                                               | 92                                                       | 45                                                           | 45                                                           |                   |                 |  |
| Water                                                                 | 972                                                      | 377                                                          | 741                                                          |                   |                 |  |
| B factors (Å <sup>2</sup> ) (overall)                                 |                                                          |                                                              |                                                              |                   |                 |  |
| Protein                                                               | 43.4                                                     | 53.03                                                        | 48.74                                                        |                   |                 |  |
| Ligand                                                                | 37.7                                                     | ATP 51.28<br>Acetyl AMP 47.39                                | 51.28<br>47.39                                               | Propyl AMP<br>CoA | 41.44<br>100.62 |  |
| Solvent                                                               | 63.4                                                     | 48.51                                                        | 60.81                                                        |                   |                 |  |
| Water                                                                 | 40.4                                                     | 38.93                                                        | 42.51                                                        |                   |                 |  |
| RMSD                                                                  |                                                          |                                                              |                                                              |                   |                 |  |
| Bond lengths (Å)                                                      | 0.007                                                    | 0.002                                                        | 0.007                                                        |                   |                 |  |
| Bond angles (°)                                                       | 1.15                                                     | 0.48                                                         | 1.12                                                         |                   |                 |  |
| Ramachandran favored (%)                                              | 96.51                                                    | 97.23                                                        | 96.83                                                        |                   |                 |  |
| Ramachandran allowed (%)                                              | 3.32                                                     | 2.77                                                         | 3.06                                                         |                   |                 |  |
| Ramachandran outliers (%)                                             | 0.16                                                     | 0                                                            | 0.11                                                         |                   |                 |  |
| Rotamer outliers (%)                                                  | 0.28                                                     | 1.46                                                         | 1.02                                                         |                   |                 |  |

RMSD, root-mean-square deviation.  
<sup>a</sup>Highest-resolution shell shown in parentheses.  
<sup>b</sup>R<sub>free</sub> was calculated with 10% of the data or no greater than 2,000 reflections, whichever is lesser.

| Supplemental Table 1. Crystallographic data and refinement statistics |                                                          |                                                   |                                                          |
|-----------------------------------------------------------------------|----------------------------------------------------------|---------------------------------------------------|----------------------------------------------------------|
| Data name                                                             | <i>Cryptococcus neoformans</i><br>Acetyl-AMS<br>PDB 5U29 | <i>Cryptococcus neoformans</i><br>Apo<br>PDB 5VPV | <i>Cryptococcus neoformans</i><br>Acetyl-AMP<br>PDB 74LG |
| <b>Data collection</b>                                                |                                                          |                                                   |                                                          |
| Wavelength (Å)                                                        | 0.9786                                                   | 0.9787                                            | 0.9787                                                   |
| Space group                                                           | P 1                                                      | P 4 <sub>1</sub> 2 <sub>1</sub> 2                 | P 1 2 <sub>1</sub> 1                                     |
| Cell dimensions                                                       |                                                          |                                                   |                                                          |
| a, b, c (Å)                                                           | 71.28 83.78 101.6                                        | 176.98 176.98 159.92                              | 72.39 185.75 84.88                                       |
| α, β, γ (°)                                                           | 110.3 105.8 87.8                                         | 90.0 90.0 90.0                                    | 90.0 94.0 90.0                                           |
| Resolution (Å)                                                        | 50 – 2.50 (2.56 – 2.50)                                  | 50 - 2.60 (2.67 - 2.60)                           | 50 - 2.20 (2.26 - 2.20)                                  |
| No. of unique reflections                                             | 72,292 (5,310)                                           | 78,331 (5,723)                                    | 110,867 (8,124)                                          |
| R <sub>merge</sub> (%)                                                | 7.3 (58.8)                                               | 16.0 (52.1)                                       | 8.0 (62.5)                                               |
| I/σ(I)                                                                | 14.69 (2.64)                                             | 12.18 (5.02)                                      | 12.10 (2.25)                                             |
| Completeness (%)                                                      | 98.5 (97.8)                                              | 100.0 (100.0)                                     | 98.1 (97.3)                                              |
| Redundancy                                                            | 3.9 (4.0)                                                | 12.4 (12.7)                                       | 4.8 (4.8)                                                |
| CC <sub>1/2</sub>                                                     | 99.8 (78.9)                                              | 99.2 (95.2)                                       | 99.7 (84.6)                                              |
| <b>Refinement</b>                                                     |                                                          |                                                   |                                                          |
| Resolution (Å)                                                        | 50 – 2.50                                                | 50 – 2.60                                         | 50 – 2.20                                                |
| No. of unique reflections                                             | 72,227                                                   | 78,263                                            | 110,839                                                  |
| R <sub>work</sub> /R <sub>free</sub> <sup>b</sup>                     | 0.153 (0.236)<br>0.209 (0.309)                           | 0.156 (0.182)<br>0.216 (0.281)                    | 0.155 (0.239)<br>0.196 (0.313)                           |
| No. of atoms                                                          |                                                          |                                                   |                                                          |
| Protein                                                               | 15,218                                                   | 14,150                                            | 15,166                                                   |
| Ligand                                                                | 78                                                       | N/A                                               | 78                                                       |
| Solvent                                                               | 43                                                       | 80                                                | 81                                                       |
| Water                                                                 | 402                                                      | 685                                               | 1,032                                                    |
| B factors (Å <sup>2</sup> ) (overall)                                 |                                                          |                                                   |                                                          |
| Protein                                                               | 52.02                                                    | 35.91                                             | 45.54                                                    |
| Ligand                                                                | 43.02                                                    | N/A                                               | 37.57                                                    |
| Solvent                                                               | 75.68                                                    | 69.15                                             | 53.89                                                    |
| Water                                                                 | 43.25                                                    | 34.40                                             | 43.55                                                    |
| RMSD                                                                  |                                                          |                                                   |                                                          |
| Bond lengths (Å)                                                      | 0.007                                                    | 0.007                                             | 0.007                                                    |
| Bond angles (°)                                                       | 0.91                                                     | 1.19                                              | 1.17                                                     |
| Ramachandran favored (%)                                              | 97.90                                                    | 96.00                                             | 96.85                                                    |
| Ramachandran allowed (%)                                              | 2.10                                                     | 3.78                                              | 3.04                                                     |
| Ramachandran outliers (%)                                             | 0                                                        | 0.22                                              | 0.10                                                     |
| Rotamer outliers (%)                                                  | 0.79                                                     | 1.80                                              | 0.83                                                     |

RMSD, root-mean-square deviation.

<sup>a</sup>Highest-resolution shell shown in parentheses.

<sup>b</sup>R<sub>free</sub> was calculated with 10% of the data or no greater than 2,000 reflections, whichever is lesser.

| Supplemental Table 1. Crystallographic data and refinement statistics |                                                         |                                                         |                                                       |
|-----------------------------------------------------------------------|---------------------------------------------------------|---------------------------------------------------------|-------------------------------------------------------|
| Data name                                                             | <i>Cryptococcus neoformans</i><br>Ethyl-AMP<br>PDB 7KNO | <i>Cryptococcus neoformans</i><br>Butyl-AMP<br>PDB 7KNP | <i>Coccidioides immitis</i><br>Propyl-AMP<br>PDB 7KQ6 |
| <b>Data collection</b>                                                |                                                         |                                                         |                                                       |
| Wavelength (Å)                                                        | 0.9787                                                  | 0.9787                                                  | 0.9787                                                |
| Space group                                                           | P 1 2 <sub>1</sub> 1                                    | P 1 2 <sub>1</sub> 1                                    | P 1 2 <sub>1</sub> 1                                  |
| Cell dimensions                                                       |                                                         |                                                         |                                                       |
| a, b, c (Å)                                                           | 72.69 184.7 84.84                                       | 72.25 184.66 85.13                                      | 106.98 116.08 107.33                                  |
| α, β, γ (°)                                                           | 90.0 93.9 90.0                                          | 90.0 93.8 90.0                                          | 90.0 119.8 90.0                                       |
| Resolution (Å)                                                        | 50 – 1.80 (1.85 – 1.80)                                 | 50 – 2.25 (2.31 – 2.25)                                 | 50 – 1.80 (1.85 – 1.80)                               |
| No. of unique reflections                                             | 205,272 (15,138)                                        | 103,490 (7,597)                                         | 201,793 (15,201)                                      |
| R <sub>merge</sub> (%)                                                | 5.2 (51.5)                                              | 9.0 (54.7)                                              | 4.8 (54.5)                                            |
| I/σ(I)                                                                | 15.12 (2.31)                                            | 10.14 (2.60)                                            | 15.73 (2.10)                                          |
| Completeness (%)                                                      | 99.8 (99.9)                                             | 98.4 (97.9)                                             | 95.8 (97.9)                                           |
| Redundancy                                                            | 3.8 (3.7)                                               | 3.9 (3.9)                                               | 3.1 (3.0)                                             |
| CC <sub>1/2</sub>                                                     | 99.9 (84.9)                                             | 99.5 (81.0)                                             | 99.9 (74.4)                                           |
| <b>Refinement</b>                                                     |                                                         |                                                         |                                                       |
| Resolution (Å)                                                        | 50 – 1.80                                               | 50 – 2.25                                               | 50 – 1.80                                             |
| No. of unique reflections                                             | 205,190                                                 | 103,450                                                 | 201,774                                               |
| R <sub>work</sub> /R <sub>free</sub> <sup>b</sup>                     | 0.164 (0.261)<br>0.190 (0.285)                          | 0.176 (0.235)<br>0.213 (0.267)                          | 0.162 (0.240)<br>0.185 (0.288)                        |
| No. of atoms                                                          |                                                         |                                                         |                                                       |
| Protein                                                               | 14,987                                                  | 13,988                                                  | 14,057                                                |
| Ligand                                                                | 75                                                      | 81                                                      | 78                                                    |
| Solvent                                                               | 57                                                      | 58                                                      | 128                                                   |
| Water                                                                 | 1,761                                                   | 822                                                     | 1,556                                                 |
| B factors (Å <sup>2</sup> ) (overall)                                 |                                                         |                                                         |                                                       |
| Protein                                                               | 37.82                                                   | 53.84                                                   | 31.65                                                 |
| Ligand                                                                | 28.84                                                   | 51.53                                                   | 24.79                                                 |
| Solvent                                                               | 46.77                                                   | 52.46                                                   | 34.87                                                 |
| Water                                                                 | 39.26                                                   | 44.22                                                   | 36.39                                                 |
| RMSD                                                                  |                                                         |                                                         |                                                       |
| Bond lengths (Å)                                                      | 0.008                                                   | 0.007                                                   | 0.007                                                 |
| Bond angles (°)                                                       | 0.90                                                    | 0.83                                                    | 0.80                                                  |
| Ramachandran favored (%)                                              | 96.86                                                   | 96.18                                                   | 95.88                                                 |
| Ramachandran allowed (%)                                              | 2.98                                                    | 3.71                                                    | 4.12                                                  |
| Ramachandran outliers (%)                                             | 0.16                                                    | 0.11                                                    | 0                                                     |
| Rotamer outliers (%)                                                  | 0.13                                                    | 0.85                                                    | 0.55                                                  |

RMSD, root-mean-square deviation.  
<sup>a</sup>Highest-resolution shell shown in parentheses.  
<sup>b</sup>Rfree was calculated with 10% of the data or no greater than 2,000 reflections, whichever is lesser.

| Supplemental Table 1. Crystallographic data and refinement statistics |                                                      |                                                       |                                                           |       |
|-----------------------------------------------------------------------|------------------------------------------------------|-------------------------------------------------------|-----------------------------------------------------------|-------|
| Data name                                                             | <i>Coccidioides immitis</i><br>Ethyl-AMP<br>PDB 7KQZ | <i>Coccidioides immitis</i><br>Methyl-AMP<br>PDB 7L3P | <i>Coccidioides immitis</i><br>Methyl-AMP/CoA<br>PDB 7L3Q |       |
| <b>Data collection</b>                                                |                                                      |                                                       |                                                           |       |
| Wavelength (Å)                                                        | 0.9787                                               | 0.9787                                                | 0.9787                                                    |       |
| Space group                                                           | P 6 <sub>3</sub>                                     | P 6 <sub>3</sub>                                      | P 1 2 <sub>1</sub> 1                                      |       |
| Cell dimensions                                                       |                                                      |                                                       |                                                           |       |
| a, b, c (Å)                                                           | 107.17 107.17 116.17                                 | 107.57 107.57 116.48                                  | 106.44 116.27 106.82                                      |       |
| α, β, γ (°)                                                           | 90.0 90.0 120.0                                      | 90.0 90.0 120.0                                       | 90.0 119.7 90.0                                           |       |
| Resolution (Å)                                                        | 50 – 2.15 (2.21 – 2.15)                              | 50 – 2.10 (2.15 – 2.10)                               | 50 – 2.15 (2.21 – 2.15)                                   |       |
| No. of unique reflections                                             | 41,174 (3,016)                                       | 44,619 (3,324)                                        | 115,434 (8,805)                                           |       |
| R <sub>merge</sub> (%)                                                | 6.7 (55.7)                                           | 5.9 (62.8)                                            | 5.3 (56.5)                                                |       |
| I/σ(I)                                                                | 21.83 (4.24)                                         | 22.95 (3.72)                                          | 13.74 (2.24)                                              |       |
| Completeness (%)                                                      | 100.0 (100.0)                                        | 99.9 (88.6)                                           | 93.9 (97.4)                                               |       |
| Redundancy                                                            | 9.0 (9.0)                                            | 8.9 (8.9)                                             | 3.1 (3.0)                                                 |       |
| CC <sub>1/2</sub>                                                     | 99.9 (90.3)                                          | 99.9 (88.6)                                           | 99.8 (70.7)                                               |       |
| <b>Refinement</b>                                                     |                                                      |                                                       |                                                           |       |
| Resolution (Å)                                                        | 50 – 2.15                                            | 50 – 2.10                                             | 50 – 2.15                                                 |       |
| No. of unique reflections                                             | 41,142                                               | 44,615                                                | 115,426                                                   |       |
| R <sub>work</sub> /R <sub>free</sub> <sup>b</sup>                     | 0.154 (0.195)<br>0.192 (0.238)                       | 0.160 (0.221)<br>0.195 (0.248)                        | 0.187 (0.277)<br>0.233 (0.318)                            |       |
| No. of atoms                                                          |                                                      |                                                       |                                                           |       |
| Protein                                                               | 4,707                                                | 4,636                                                 | 14,447                                                    |       |
| Ligand                                                                | 25                                                   | 24                                                    | Methyl-AMP                                                | 72    |
|                                                                       |                                                      |                                                       | Coenzyme A                                                | 144   |
| Solvent                                                               | 20                                                   | 37                                                    | 64                                                        |       |
| Water                                                                 | 323                                                  | 298                                                   | 541                                                       |       |
| B factors (Å <sup>2</sup> ) (overall)                                 |                                                      |                                                       |                                                           |       |
| Protein                                                               | 50.19                                                | 51.21                                                 | 50.77                                                     |       |
| Ligand                                                                |                                                      |                                                       | Methyl AMP                                                | 43.17 |
|                                                                       | 39.78                                                | 45.79                                                 | Coenzyme A                                                | 66.31 |
| Solvent                                                               | 45.14                                                | 51.31                                                 | 41.51                                                     |       |
| Water                                                                 | 44.35                                                | 46.68                                                 | 40.76                                                     |       |
| RMSD                                                                  |                                                      |                                                       |                                                           |       |
| Bond lengths (Å)                                                      | 0.007                                                | 0.007                                                 | 0.008                                                     |       |
| Bond angles (°)                                                       | 1.16                                                 | 0.80                                                  | 1.19                                                      |       |
| Ramachandran favored (%)                                              | 96.26                                                | 96.27                                                 | 95.83                                                     |       |
| Ramachandran allowed (%)                                              | 3.57                                                 | 3.56                                                  | 4.17                                                      |       |
| Ramachandran outliers (%)                                             | 0.17                                                 | 0.17                                                  | 0                                                         |       |
| Rotamer outliers (%)                                                  | 0.64                                                 | 0.85                                                  | 0.69                                                      |       |

RMSD, root-mean-square deviation.

<sup>a</sup>Highest-resolution shell shown in parentheses.

<sup>b</sup>Rfree was calculated with 10% of the data or no greater than 2,000 reflections, whichever is lesser.



| Supplemental Table 1. Crystallographic data and refinement statistics |                                                          |                                                        |                                                   |
|-----------------------------------------------------------------------|----------------------------------------------------------|--------------------------------------------------------|---------------------------------------------------|
| Data name                                                             | <i>Coccidioides immitis</i><br>Ethyl-AMP/CoA<br>PDB 7KVY | <i>Aspergillus fumigatus</i><br>Propyl-AMP<br>PDB 7KDN | <i>Candida albicans</i><br>Propyl-AMP<br>PDB 7KDS |
| <b>Data collection</b>                                                |                                                          |                                                        |                                                   |
| Wavelength (Å)                                                        | 0.9787                                                   | 0.9787                                                 | 0.9795                                            |
| Space group                                                           | P 6 <sub>3</sub>                                         | P 1                                                    | P 4 <sub>1</sub> 3 2                              |
| <b>Cell dimensions</b>                                                |                                                          |                                                        |                                                   |
| a, b, c (Å)                                                           | 106.94 106.94 115.96                                     | 103.79 104.21 125.65                                   | 166.92 166.92 166.92                              |
| α, β, γ (°)                                                           | 90.0 90.0 120.0                                          | 68.154 66.546 62.224                                   | 90.0 90.0 90.0                                    |
| Resolution (Å)                                                        | 50 – 1.90 (1.95 – 1.90)                                  | 50 – 2.80 (2.87 – 2.80)                                | 50 – 2.90 (2.98 – 2.90)                           |
| No. of unique reflections                                             | 59,143 (4,345)                                           | 100,485 (7,598)                                        | 18,239 (1,305)                                    |
| R <sub>merge</sub> (%)                                                | 5.3 (86.0)                                               | 12.0 (93.7)                                            | 8.1 (261.7)                                       |
| I/σ(I)                                                                | 18.29 (2.09)                                             | 10.14 (1.57)                                           | 34.52 (1.55)                                      |
| Completeness (%)                                                      | 100.0 (100.0)                                            | 97.9 (97.5)                                            | 99.9 (100.0)                                      |
| Redundancy                                                            | 5.7 (5.7)                                                | 3.9 (4.0)                                              | 38.5 (35.8)                                       |
| CC <sub>1/2</sub>                                                     | 99.9 (68.8)                                              | 99.6 (70.3)                                            | 100.0 (63.4)                                      |
| <b>Refinement</b>                                                     |                                                          |                                                        |                                                   |
| Resolution (Å)                                                        | 50 – 1.90                                                | 50 – 2.80                                              | 50 – 2.90                                         |
| No. of unique reflections                                             | 59,133                                                   | 100,431                                                | 18,188                                            |
| R <sub>work</sub> /R <sub>free</sub> <sup>b</sup>                     | 0.163 (0.256)<br>0.193 (0.297)                           | 0.216 (0.355)<br>0.246 (0.476)                         | 0.232 (0.350)<br>0.267 (0.359)                    |
| <b>No. of atoms</b>                                                   |                                                          |                                                        |                                                   |
| Protein                                                               | 4,917                                                    | 26,464                                                 | 4,801                                             |
| Ligand                                                                | Ethyl AMP 25<br>Coenzyme A 48                            | 156                                                    | 26                                                |
| Solvent                                                               | 36                                                       | N/A                                                    | 1                                                 |
| Water                                                                 | 351                                                      | 43                                                     | 4                                                 |
| <b>B factors (Å<sup>2</sup>) (overall)</b>                            |                                                          |                                                        |                                                   |
| Protein                                                               | 45.71                                                    | 65.79                                                  | 118.46                                            |
| Ligand                                                                | Ethyl AMP 35.93<br>Coenzyme A 56.25                      | 64.74                                                  | 109.02                                            |
| Solvent                                                               | 45.71                                                    | N/A                                                    | 179.85                                            |
| Water                                                                 | 44.40                                                    | 52.71                                                  | 99.77                                             |
| <b>RMSD</b>                                                           |                                                          |                                                        |                                                   |
| Bond lengths (Å)                                                      | 0.008                                                    | 0.004                                                  | 0.004                                             |
| Bond angles (°)                                                       | 1.15                                                     | 0.96                                                   | 0.94                                              |
| Ramachandran favored (%)                                              | 96.17                                                    | 96.94                                                  | 97.22                                             |
| Ramachandran allowed (%)                                              | 3.83                                                     | 3.06                                                   | 2.78                                              |
| Ramachandran outliers (%)                                             | 0                                                        | 0                                                      | 0                                                 |
| Rotamer outliers (%)                                                  | 1.00                                                     | 1.39                                                   | 1.08                                              |

RMSD, root-mean-square deviation.  
<sup>a</sup>Highest-resolution shell shown in parentheses.  
<sup>b</sup>Rfree was calculated with 10% of the data or no greater than 2,000 reflections, whichever is lesser.

| Supplemental Table 1. Crystallographic data and refinement statistics                                             |                                                         |
|-------------------------------------------------------------------------------------------------------------------|---------------------------------------------------------|
| Data name                                                                                                         | <i>Coccidioides posadasii</i><br>Propyl-AMP<br>PDB 7KCP |
| <b>Data collection</b>                                                                                            |                                                         |
| Wavelength (Å)                                                                                                    | 0.9787                                                  |
| Space group                                                                                                       | P 6 <sub>3</sub>                                        |
| Cell dimensions                                                                                                   |                                                         |
| a, b, c (Å)                                                                                                       | 107.17 107.17 116.17                                    |
| α, β, γ (°)                                                                                                       | 90.0 90.0 120.0                                         |
| Resolution (Å)                                                                                                    | 50 – 2.15 (2.21 – 2.15)                                 |
| No. of unique reflections                                                                                         | 41,158 (3,025)                                          |
| R <sub>merge</sub> (%)                                                                                            | 8.1 (58.1)                                              |
| I/σ(I)                                                                                                            | 20.04 (4.20)                                            |
| Completeness (%)                                                                                                  | 100.0 (100.0)                                           |
| Redundancy                                                                                                        | 9.0 (9.0)                                               |
| CC <sub>1/2</sub>                                                                                                 | 99.9 (90.5)                                             |
| <b>Refinement</b>                                                                                                 |                                                         |
| Resolution (Å)                                                                                                    | 50 – 2.15                                               |
| No. of unique reflections                                                                                         | 41,145                                                  |
| R <sub>work</sub> /R <sub>free</sub> <sup>b</sup>                                                                 | 0.154 (0.195)<br>0.192 (0.238)                          |
| No. of atoms                                                                                                      |                                                         |
| Protein                                                                                                           | 4,604                                                   |
| Ligand                                                                                                            | 26                                                      |
| Solvent                                                                                                           | 45                                                      |
| Water                                                                                                             | 371                                                     |
| B factors (Å <sup>2</sup> ) (overall)                                                                             |                                                         |
| Protein                                                                                                           | 42.88                                                   |
| Ligand                                                                                                            | 34.32                                                   |
| Solvent                                                                                                           | 44.80                                                   |
| Water                                                                                                             | 41.07                                                   |
| RMSD                                                                                                              |                                                         |
| Bond lengths (Å)                                                                                                  | 0.007                                                   |
| Bond angles (°)                                                                                                   | 1.16                                                    |
| Ramachandran favored (%)                                                                                          | 96.26                                                   |
| Ramachandran allowed (%)                                                                                          | 3.57                                                    |
| Ramachandran outliers (%)                                                                                         | 0.17                                                    |
| Rotamer outliers (%)                                                                                              | 0.64                                                    |
| RMSD, root-mean-square deviation.                                                                                 |                                                         |
| <sup>a</sup> Highest-resolution shell shown in parentheses.                                                       |                                                         |
| <sup>b</sup> Rfree was calculated with 10% of the data or no greater than 2,000 reflections, whichever is lesser. |                                                         |

## Supplementary Table 1.

| Species                   | Species   |           |           |           |           |           |           |
|---------------------------|-----------|-----------|-----------|-----------|-----------|-----------|-----------|
|                           | <i>Cn</i> | <i>Af</i> | <i>Ca</i> | <i>Ci</i> | <i>Cp</i> | <i>Sc</i> | <i>Se</i> |
| <i>C. neoformans (Cn)</i> | -         | 63.13 %   | 58.95 %   | 59.97 %   | 59.65 %   | 56.50 %   | 51.03 %   |
| <i>A. fumigatus (Af)</i>  | 0.61 Å    | -         | 63.29 %   | 82.26 %   | 82.71 %   | 62.99 %   | 51.10 %   |
| <i>C. albicans (Ca)</i>   | 0.56 Å    | 0.53 Å    | -         | 61.24 %   | 61.24 %   | 59.97 %   | 49.84 %   |
| <i>C. immitis (Ci)</i>    | 0.55 Å    | 0.30 Å    | 0.51 Å    | -         | 99.13 %   | 63.41 %   | 50.94 %   |
| <i>C. posadasii (Cp)</i>  | 0.55 Å    | 0.30 Å    | 0.51 Å    | 0.11 Å    | -         | 63.26 %   | 51.27 %   |
| <i>S. cerevisiae (Sc)</i> | 0.60 Å    | 0.55 Å    | 0.56 Å    | 0.56 Å    | 0.55 Å    | -         | 46.55 %   |
| <i>S. enterica (Se)</i>   | 0.66 Å    | 0.71 Å    | 0.76 Å    | 0.66 Å    | 0.61 Å    | 0.72 Å    | -         |

**Supplementary Table 2. Structural and Sequence comparison of Acs1.** Sequence alignment performed by NCBI blast pairwise alignment (Ref) with percent identity shown in the upper right section of the table. Alignment performed by PyMol (Ref) of C $\alpha$  atoms in the N-terminal extension and N-terminal domain of pairwise species expressed as RMSD (Å) in the bottom left section of the table.

|      |        |   |                                                              |
|------|--------|---|--------------------------------------------------------------|
| Crne | J9VFT1 | 1 | M-----GKTEV-APGVHHVHPLPDSVPESEDLFAP-----PPRMQKKEGRP          |
| Coim | J3KJM0 | 1 | MS-----ETPAEP-KLPVVVEAHQVDTFDVPGVFYEN-----HP                 |
| Copo | C5PGB4 | 1 | MS-----ETPAEP-KPPVVVEAHQVDTFDVPGVFYEN-----HP                 |
| Asfu | Q4WQ02 | 1 | MS-----DGDVQPAKPAVVLEANDVDTFHVPKAFYEK-----HP                 |
| Caal | Q8NHN3 | 1 | M-----PTEQ-THNVVHEANGVKLRETPKEFFER-----QP                    |
| Sace | Q01574 | 1 | MSPSAVQSSKLEEQSSIDKCLKAKMSQSAATAQOKKEHEVEHLTSVKIVPQRPISDRLQP |

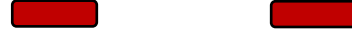

|      |        |    |                                                                |
|------|--------|----|----------------------------------------------------------------|
| Crne | J9VFT1 | 40 | -----KPHIGPNYESYVKEWAKTVGPNSENDEWAAAKARETLDWYDDFKTVRAGGFHEG--  |
| Coim | J3KJM0 | 34 | H-----EPHLS-GMNEYNQLYQQSI-NDPDTFWARMARDLITFEKDFDKTHIGTLEGG--   |
| Copo | C5PGB4 | 34 | H-----EPHLS-GMNEYNQLYQQSI-NDPDTFWARMARDLITFEKDFDKTHIGTLEGG--   |
| Asfu | Q4WQ02 | 35 | S-----KTHLK-DLDEYKPLYDESI-RSPDTFWARMARELLITFDKDFQTTTHIGSLENG-- |
| Caal | Q8NHN3 | 31 | N-----KGHIH-DVNQYKQMYEQSI-KDPQGGFFGPLAKELLISWDHDFHTVKSGTLKNG-- |
| Sace | Q01574 | 61 | AIATHYSPHLD-GLQDYQRLHKESI-EDPAKFFGSKATQFLNWSKPFDKVFIIPDKTGRP   |

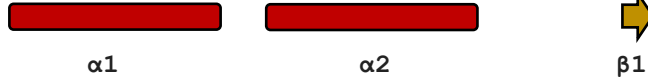

|      |        |     |                                                             |
|------|--------|-----|-------------------------------------------------------------|
| Crne | J9VFT1 | 93  | ---DVQWFPEGTLNAAYNCLDRHYKPKKTAIIYEADPSESREVSYEELMQETCRVAN   |
| Coim | J3KJM0 | 85  | ---DNAWFGRLNASFNCVDRHAMRDPNKVAIIYEADPGHGRSITYAELLKEVSRLLAW  |
| Copo | C5PGB4 | 85  | ---DNAWFGRLNASFNCVDRHAMRDPNKVAIIYEADPGHGRSITYAELLKEVSRLLAW  |
| Asfu | Q4WQ02 | 86  | ---DNAWFGRLNASFNCVDRHAMRDPNKVAIIYEADPNEGRIITYGELLREVSRLAW   |
| Caal | Q8NHN3 | 82  | ---DAAWFLGELNASYNCVDRHAFANPDKPALICEADDEKDSHILITYGDLLEVSQVAG |
| Sace | Q01574 | 119 | SFQNNAWFLNQLNACYNVDRHALKTPNKKALIFEGDEPGQYSITYKELLEVCQVAQ    |

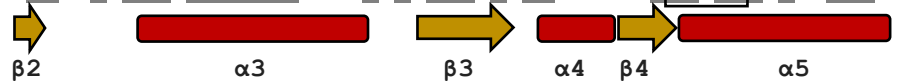

A2

|      |        |     |                                                               |
|------|--------|-----|---------------------------------------------------------------|
| Crne | J9VFT1 | 150 | VLK-SYGVKKGDAVSIYLPMTWQAAAFLACARIGAIHSAVVFAGFSAESLRDRVNDCECK  |
| Coim | J3KJM0 | 142 | VMK-SQGVKRGDTVAIYLPMIPEAIFALLACARIGAIHSSVVFAGFSSDSLDRDRLDARSK |
| Copo | C5PGB4 | 142 | VMK-SQGVKRGDTVAIYLPMIPEAIFALLACARIGAIHSSVVFAGFSSDSLDRDRLDARSK |
| Asfu | Q4WQ02 | 143 | VLK-QRQGVKKGDTVAIYLPMIPEAVVAFACARIGAIHSSVVFAGFSSDSLDRDRLDAGSK |
| Caal | Q8NHN3 | 139 | VLQ-SWGIKKGDTVAIYLPNAQAIILAIARLGAHHSVIFAGFSAESIKDRVNDASCK     |
| Sace | Q01574 | 179 | VLTYSMGVKRGDTVAIYMPVPEAIIITLLAISRIGAIHSSVVFAGFSSNSLRDRINDGDSK |

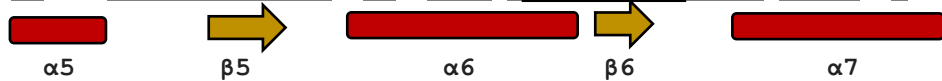

|      |        |     |                                                              |
|------|--------|-----|--------------------------------------------------------------|
| Crne | J9VFT1 | 209 | VLITTDGKRRGGKTIATKQIVDAALQOCPLVENVLVLRRT-GNKVPMTEGRDKWDEECA  |
| Coim | J3KJM0 | 201 | FLITTDGKRRGGKVIGTKKIVDEALKQCPDVTNCLVFKRT-GADVPWTKGRDLWHEEVD  |
| Copo | C5PGB4 | 201 | FLITTDGKRRGGKVIGTKKIVDEALKQCPDVTNCLVFKRT-GADVPWTKGRDLWHEEVE  |
| Asfu | Q4WQ02 | 202 | VITTDGKRRGGKVIGTKRIVDEALKQCPDVTNCLVFKRT-GAEVPWTNGRDLWHEEVE   |
| Caal | Q8NHN3 | 198 | ALITCDEGKRRGGRTTNIKLCDEALVDCPTVEKVLVYKRTNNPEIHLTEGRDYWDVETA  |
| Sace | Q01574 | 239 | VVITTDENRGGKVIETKRIIVDDALRETPGVRHVLVYKRTNNPSVAFHAPRDLDWATEKK |

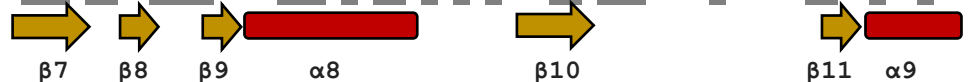

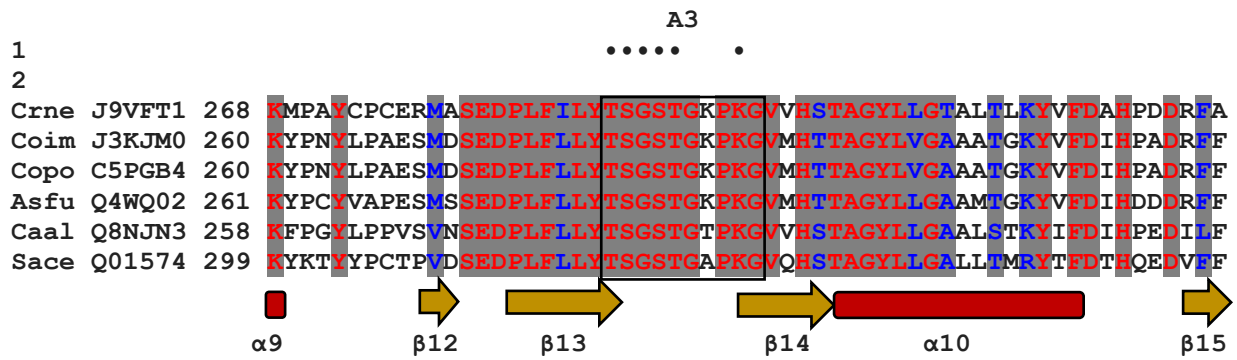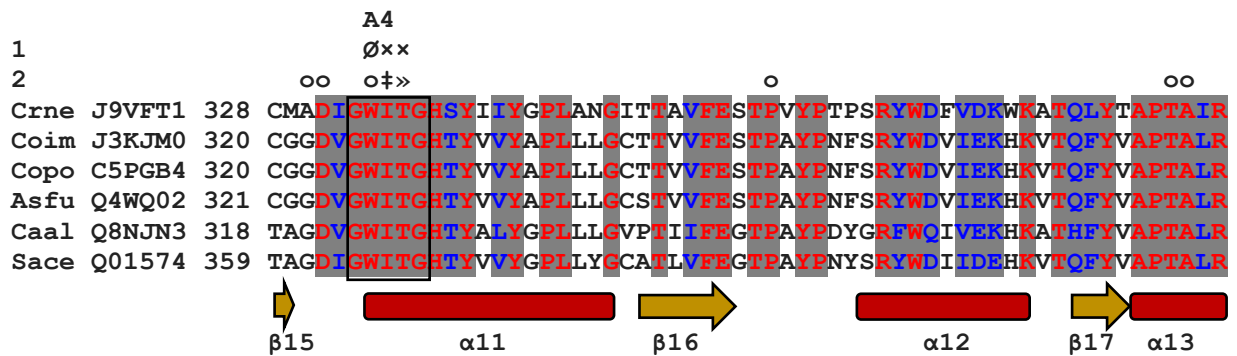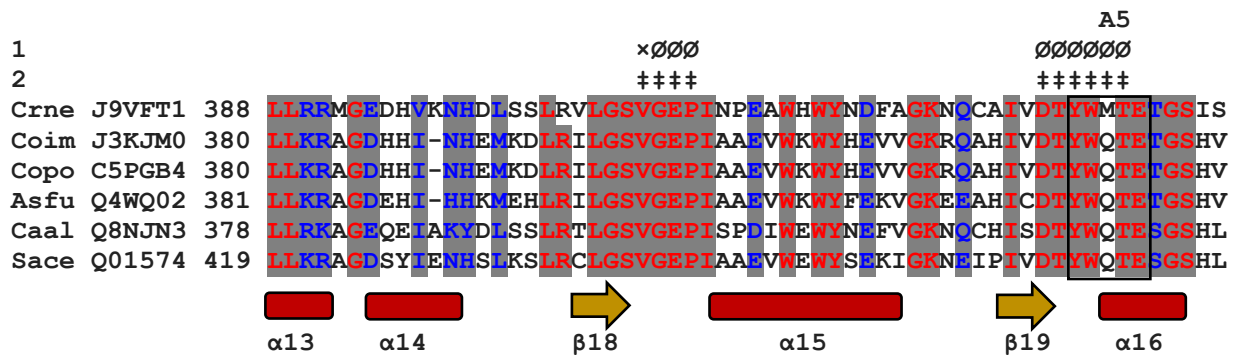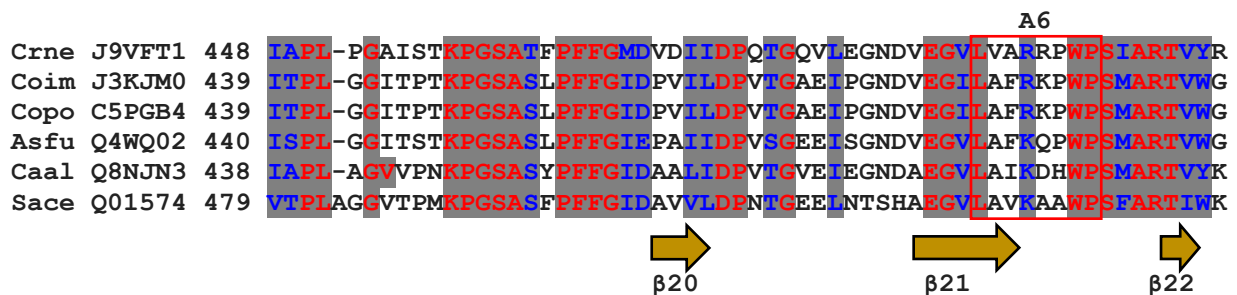



yellow arrows (beta strands). Identical residues are in red font with gray background and chemically similar compounds are in blue font with gray background. Boxes over the alignment indicate conserved Acs1 enzyme family motifs labeled A1-A10. Symbols above the alignment indicate ligand or substrate interacting residues with “1” for the Acetylation reaction conformation (•) ATP only, (×) Acetyl-AMP only and, (∅) both ligands; “2” for the thioesterification reaction conformation. (o) Coenzyme A only, (‡) Acetyl-AMP only, (») both.

| Species              | Compound IC <sub>50</sub> (μM) |           |
|----------------------|--------------------------------|-----------|
|                      | ethyl-AMP                      | butyl-AMP |
| <i>C. neoformans</i> | 2.10                           | > 50      |
| <i>A. fumigatus</i>  | 0.06                           | > 50      |
| <i>C. albicans</i>   | 0.29                           | > 50      |
| <i>C. immitis</i>    | 0.06                           | > 50      |
| <i>C. posadasii</i>  | 0.07                           | > 50      |

**Supplemental Table 4. Potency of ethyl-AMP and butyl-AMP across fungal Acs1 recombinant proteins**



## Synthetic Procedures for the Preparation of AMP alkyl esters, AMS and AcAMS.

All chemicals were purchased from Sigma Aldrich and were used without any further purification. 5'-O-Sulfamoyl-2', 3'-O-isopropylideneadenosine, N-acetoxysuccinimide, AMS and Ac-AMS were prepared by the method of Qiao (1). All tested compounds have purity of >95% as determined by HPLC analysis (UV detection @254 nm). Purification of compounds was done on a Biotage® Isolera using a Biotage® SNAP cartridge KP-Sil 50g. Purity of compounds was determined using an Agilent HPLC utilizing a C-18 column (Waters Nova-Pak; 3.9 x 100 mm) with the following method: Solvent A = H<sub>2</sub>O (0.1% TFA), Solvent B = MeCN; 0 to 20 min, (10 to 90% B), 20 to 25 min (90 to 10% B); detection was set at two wavelengths (254 and 280 nm). <sup>1</sup>H and <sup>13</sup>C NMR were recorded on a BrukerAvance III 500 outfitted with a 5mm BBFO Z-gradient probe. Chemical shifts  $\delta$  are in ppm, and spectra are referenced using the residual solvent peak. The following abbreviations are used: singlet (s), doublet (d), triplet (t), quartet (q), double doublet (dd), quintet (quin), multiplet (m), broad signal (br s). High-resolution mass spectra (HRMS) were obtained on a Bruker Maxis Plus Quadrupole Time-of-Flight (QTOF).

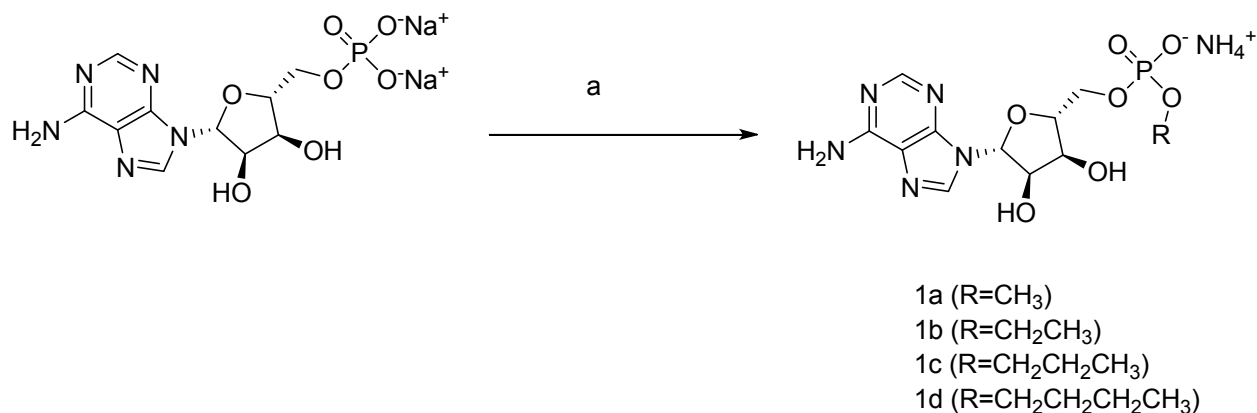

**Reagent and reaction conditions:** (a) Corresponding alcohol, EDC (5.0 eq), rt, 24 h.

### General procedure for preparation of adenosine 5'-alkyl phosphate (1a-1d)

To a stirred solution of adenosine monophosphate disodium salt (1.00 g, 2.56 mmol) in 150 mL of corresponding alcohol was added EDC (2.45 g, 12.78 mmol). The reaction was stirred for 24

hr. followed by removal of the solvent under reduced under pressure. The resulting solid was purified by column chromatography on a Biotage Isolera using a Biotage SNAP cartridge KP-Sil 50g using a linear gradient of 80:20 to 70:30 (CH<sub>2</sub>Cl<sub>2</sub>/MeOH with 4% NH<sub>4</sub>OH) to afford the corresponding compounds **1a-1d** as white solids.

#### **Adenosine 5'-methyl phosphate (Methyl-AMP) (1a)**

Yield; 63%, <sup>1</sup>H NMR (500 MHz, DMSO-*d*6) δ 8.46 (s, 1H), 8.15 (s, 1H), 7.31 (s, 2H), 5.92 (d, *J*= 6.0 Hz, 1H), 5.54 (s, 1H), 5.43(s, 1H), 4.60 (t, *J* = 6.9, 1H), 4.20 (t, *J* = 4.0Hz), 4.02 (q, *J* = 4.0Hz), 3.84 (m, 1H), 3.80 (m, 1H), 3.31 (d, *J* = 10.5Hz, 3H), <sup>13</sup>C NMR (125 MHz, DMSO-*d*6), 156.4, 153.1, 150.1, 119.3, 87.4, 84.4, 74.4, 71.3, 65.0, 52.1, HRMS for C<sub>11</sub>H<sub>16</sub>N<sub>5</sub>O<sub>7</sub>P [M+H]<sup>+</sup> calculated; 362.0866, found; 362.0855

#### **Adenosine 5'-ethyl phosphate (Ethyl-AMP) (1b)**

Yield; 46%, <sup>1</sup>H NMR (500 MHz, DMSO-*d*6) δ 8.46 (s, 1H), 8.15 (s, 1H), 7.30 (s, 2H), 5.92 (d, *J*= 6.0 Hz, 1H), 5.56 (s, 1H), 5.55(s, 1H), 4.59 (t, *J* = 6.9, 1H), 4.19 (t, *J* = 4.0Hz), 4.03 (q, *J* = 4.0Hz), 3.87 (m, 1H), 3.79 (m, 1H), 3.68 (m, 2H), 1.08 (t, *J*= 7.0 Hz, 3H), <sup>13</sup>C NMR (125 MHz, DMSO-*d*6), 156.4, 153.1, 150.1, 139.8, 119.3, 87.4, 84.3, 74.3, 71.2, 64.9, 60.3, 17.0, HRMS for C<sub>12</sub>H<sub>18</sub>N<sub>5</sub>O<sub>7</sub>P [M+H]<sup>+</sup> calculated; 376.1023, found; 376.1033

#### **Adenosine 5'- propyl phosphate (Propyl-AMP) (1c)**

Yield; 43%, <sup>1</sup>H NMR (500 MHz, DMSO-*d*6) δ 8.44 (s, 1H), 8.15 (s, 1H), 7.30 (s, 2H), 5.91 (d, *J*= 6.0 Hz, 1H), 5.57 (s, 1H), 5.56 (s, 1H), 4.59 (t, *J* = 6.9, 1H), 4.19 (t, *J* = 4.0Hz), 4.02 (q, *J* = 4.0Hz), 3.87 (m, 1H), 3.78 (m, 1H), 3.58 (q, *J* = 6.7 Hz, 2H), 1.45 (m, 2H), 0.79 (t, *J*= 7.5 Hz, 3H), <sup>13</sup>C NMR (125 MHz, DMSO-*d*6), 156.4, 153.1, 150.0, 139.8, 119.3, 87.5, 84.2, 74.2, 71.2, 66.4, 65.0, 24.0, 10.8, HRMS for C<sub>13</sub>H<sub>20</sub>N<sub>5</sub>O<sub>7</sub>P [M+H]<sup>+</sup> calculated; 390.1179 , found; 390.1192

### Adenosine 5'- butyl phosphate (Butyl-AMP) (1d)

Yield; 35%,  $^1\text{H}$  NMR (500 MHz,  $\text{DMSO-}d_6$ )  $\delta$  8.44 (s, 1H), 8.15 (s, 1H), 7.29 (s, 2H), 5.91 (d,  $J = 6.0$  Hz, 1H), 5.52 (s, 1H), 5.42 (s, 1H), 4.58 (t,  $J = 6.9$ , 1H), 4.19 (t,  $J = 4.0$  Hz), 4.02 (q,  $J = 4.0$  Hz), 3.86 (m, 1H), 3.78 (m, 1H), 3.61 (q,  $J = 6.7$  Hz, 2H), 1.43 (m, 2H), 1.24 (m, 2H), 0.81 (t,  $J = 7.5$  Hz, 3H),  $^{13}\text{C}$  NMR (125 MHz,  $\text{DMSO-}d_6$ ), 156.4, 153.1, 150.0, 139.9, 119.3, 87.5, 84.1, 74.2, 71.2, 65.1, 64.5, 32.9, 19.0, 14.1, HRMS for  $\text{C}_{14}\text{H}_{22}\text{N}_5\text{O}_7\text{P}$   $[\text{M}+\text{H}]^+$  calculated; 404.1336, found; 404.1342

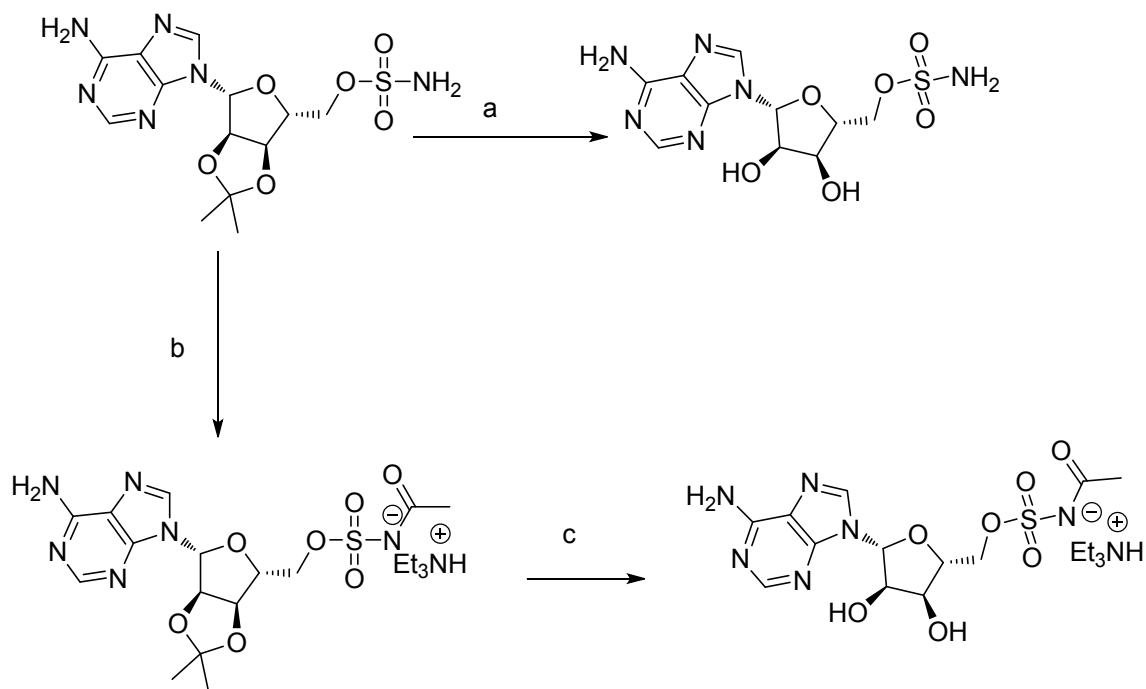

**Reagent and reaction conditions:** (a) TFA (80%) (b) N-acetoxysuccinimide,  $\text{Cs}_2\text{CO}_3$  (2eq), DMF (d) TFA (80%).

### 5'-O-Sulfamoyladenosine (AMS)

To 5'-O-Sulfamoyl-2', 3'-O-isopropylideneadenosine (50 mg, 0.13 mmol) was added 80% aq TFA (2 mL). The resulting solution was stirred for 30 min at 0 °C then concentrated under reduced pressure. Purification by column chromatography on a Biotage Isolera using a gradient elution 15 to 20% MeOH in  $\text{CH}_2\text{Cl}_2$  afforded the title compound as a white solid. Yield; 40mg, 89%,  $^1\text{H}$  NMR (500 MHz,  $\text{DMSO-}d_6$ )  $\delta$ , 8.30 (s, 1H), 8.16 (s, 1H), 7.32 (s, 2H), 7.60 (s, 2H), 5.94 (d,  $J = 5.30$  Hz,

1H), 5.44 (d, J= 5.20 Hz, 1H), 5.62 (d, J= 5.85 Hz, 1H), 4.63 (d, J=5.25 Hz, 1H), 4.30 (d, J=6.85 Hz, 1H), 4.23-4.21 (m, 2H), 4.17 (d, J=1.55 Hz), <sup>13</sup>C NMR (75 MHz, DMSO-*d*6), 156.5, 153.1, 149.9, 139.9, 119.6, 88.0, 82.0, 73.4, 70.8, 69.2.

**5'-O-[N-acyl(sulfamoyl)]-2', 3'-O-isopropylideneadenosine triethylammonium salt.**

To a solution of N-acetoxysuccinimide (0.86mmol) in DMF (10 mL) at 0 °C were added 5'-O-sulfamoyl-2',3'-O-isopropylideneadenosine<sup>1</sup> (1.29 mmol, 1.5equiv) and Cs<sub>2</sub>CO<sub>3</sub> (1.72 mmol, 2.0 eq.). The reaction mixture was warmed to rt and stirred 16 h. The reaction was concentrated under reduced pressure and the crude material was chromatographed on a Biotage Isolera using EtOAc/MeOH/Et<sub>3</sub>N (70:29:1) to afford the title compound as a white solid. Yield; 87%. <sup>1</sup>H NMR (300 MHz, DMSO-*d*6) δ 8.38 (s, 1H), 8.15 (s, 1H), 7.31 (s, 2H), 6.15 (d, J = 2.9 Hz, 1H), 5.35 (dd, J = 2.9, 6.1 Hz, 1H), 5.02 (d, J = 8.5 Hz, 1H), 4.37 (d, J = 2.5 Hz, 1H), 3.98 (d, J= 5.0Hz, 2H), 3.04 (q, J = 7.3 Hz, 6H), 1.72 (s, 3H), 1.54 (s, 3H), 1.32 (s, 3H), 1.16 (t, J = 7.3 Hz, 9H), <sup>13</sup>C NMR (75 MHz, CD<sub>3</sub>OD), 179.2, 157.3, 155.9, 149.0, 140.1, 120.0, 113.9, 90.4, 85.2, 84.3, 80.4, 68.2,43.2, 26.1, 25.1, 23.7, 7.9.

**5'-O-[N-acyl(sulfamoyl)] adenosine triethylammonium salt (Ac-AMS)**

To 5'-O-[N-acyl(sulfamoyl)]-2', 3'-O-isopropylideneadenosine triethylammonium salt (0.50 g, 0.94mmol) was added 80% aq TFA (5 mL). The resulting solution was stirred for 30 min at 0 °C then concentrated under reduced pressure. Purification by column chromatography on a Biotage Isolera using EtOAc/MeOH/Et<sub>3</sub>N (70:29:1) afforded the title compound as a pale yellow solid. Yield; 0.42 g, 89%. <sup>1</sup>H NMR (500 MHz, CD<sub>3</sub>OD) δ 8.52 (s, 1H), 8.23 (s, 1H), 6.11 (d, J = 6.0 Hz, 1H), 4.69 (s, 1H), 4.42 (s, 1H), 4.34-4.31 (m, 3H), 3.20 (q, J = 7.0 Hz, 6H), 1.98 (s, 3H), 1.31 (t, J = 7.2 Hz, 9H), <sup>1</sup>H NMR (300 MHz, DMSO-*d*6) δ 8.40 (s, 1H), 8.14 (s, 1H), 7.27 (s, 2H), 5.91 (d, J = 6.0 Hz, 1H), 5.46 (s, 1H), 5.31 (s, 1H), 4.60 (s, 1H), 4.14 (s, 1H), 4.07-3.99 (m, 3H), 3.04 (q, J

= 7.0 Hz, 6H), 1.74 (s, 3H), 1.14 (t, J = 7.2 Hz, 9H), <sup>13</sup>C NMR (75 MHz, DMSO-*d*<sub>6</sub>), 175.5, 156.5, 153.1, 150.1, 139.8, 119.3, 93.6, 87.2, 83.2, 74.1, 71.4, 67.6, 46.2, 26.9, 9.5.

## **Crystallization conditions and procedures**

### ***Aspergillus fumigatus***

*Aspergillus fumigatus* ACS1 in complex with adenosine-5'-propylphosphate (propyl AMP) was crystallized at 10 mg ml<sup>-1</sup> in sparse matrix screen Morpheus (Molecular Dimensions) condition g9 (10% w/v PEG 20000, 20% v/v PEG MME 550, 0.02M carboxylic acids (sodium formate, ammonium acetate, trisodium citrate, sodium potassium L-tartrate, sodium oxamate, 0.1M bicine/Trizma base pH 8.5), with 1mM propyl AMP and 1mM TCEP (2). No additional cryoprotectant was used.

### ***Candida albicans***

*Candida albicans* ACS2 was crystallized in complex with propyl AMP at 10 mg/ml in sparse matrix screen MCSG1 (Microlytic/Anatrace) condition g10 (100mM Mg-formate, 15% (w/v) PEG 3350) with 1mM Propyl AMP and 1mM TCEP. 25% Ethylene glycol (v/v) was used as a cryoprotectant.

### ***Coccidioides posadasii***

Crystals of *Coccidioides posadasii* ACS1 in complex with propyl AMP were grown at 10 mg/ml ACS1 in sparse matrix screen Morpheus (Molecular Dimensions) condition a6 (10% w/v PEG 8000, 20% v/v ethylene glycol, 0.03M divalent cations (MgCl<sub>2</sub>, CaCl<sub>2</sub>), 0.1M MOPS/HEPES-Na pH7.5), with 1mM propyl-AMP and 1mM TCEP (2). No additional cryoprotectant was used.

### ***Coccidioides immitis***

Crystals of *Coccidioides immitis* ACS1 in complex with methyl AMP were grown at 10 mg/ml ACS1 in sparse matrix screen MCSG1 condition f11 (0.1M HEPES/NaOH, pH7.5, 0.2M Ammonium sulfate, 25% w/v PEG 3,350), with 1mM methyl AMP and 1mM TCEP. 15% (v/v) ethylene glycol was used as a cryoprotectant. Crystals containing methyl AMP and coenzyme A were grown in sparse matrix screen MCSG1 condition a6 (18.71% PEG 3,350, 0.2M Lithium acetate), with 1mM methyl AMP, 1mM TCEP, and 1mM coenzyme A. 20% (v/v) ethylene glycol was used as a cryoprotectant. Ethyl AMP containing crystals were grown in optimization conditions based on screen MCSG1 condition h3 (200mM lithium acetate, 18.32-19.1% PEG 3350), with 1mM ethyl-AMP and 1mM TCEP. Crystals containing a complex with ethyl AMP and coenzyme A were setup in similar conditions with the addition of 1mM coenzyme A. 20% (v/v) ethylene glycol was used as a cryoprotectant. Finally, crystals containing propyl AMP were grown in sparse matrix screen MCSG1 condition h5 (200 mM Potassium chloride, 20% (w/v) PEG 3350), with 1mM pro-pyl AMP and 1mM TCEP. 20% (v/v) ethylene glycol was used as a cryoprotectant.

### ***Cryptococcus neoformans***

Crystals of *Cryptococcus neoformans* ACS1 were generally grown at 10 mg/ml in optimization conditions based on screen Wizard Classic 1&2 (Rigaku Reagents) condition e8 (10-20% (w/v) PEG 8000, 0.1M Na/K phosphate, pH 5.8-7). 20% (v/v) ethylene glycol was used as a cryoprotectant. Where applicable, AMP esters were added at 1mM (propyl, ethyl, and butyl AMP), coen-zyme A at 1-2mM, acetyl AMS at 0.5mM, ATP/MgCl<sub>2</sub> at 1mM and TCEP at 1mM. Crystals of apo/acetylated active site lysine 640 from *Cryptococcus neoformans* were grown in sparse matrix screen Morpheus (Rigaku Reagents) condition h3 (10.0% w/v PEG4,000, 20% glycerol, 0.02M amino acid mix, 0.1M MES/imidazole pH6.5) (34). No additional cryo-protectant was used.

### **Structure determination**

The structures of the fungal ACS1 apo or with compound were collected between 2016-2020 at the Advanced Photon Source, beamlines 21-ID-F and G (CCD Rayonix MX-225 and MX-300 X-ray detector respectively), with the exception of 7KDS (*Candida albicans* ACS2) which was collected at the Canadian Lightsource (Pilatus3 S 6M X-ray detector). Data were reduced with XDS/XSCALE, (3) and solved by molecular replacement using Phaser with input models based upon previously solved crystal structures of fungal, yeast or bacterial ACS1. Iterative manual model building using Coot (4) and Phenix.Refine continued until R and Rfree converged (5). Model quality was validated using Coot and MolProbity (6). Structures were validated using Molprobity prior to deposition in the Protein Data Bank (See Crystallographic Table) (7, 8). Diffraction images are available on Integrated Resource for Reproducibility in Macromolecular Crystallography (<http://www.proteindiffraction.org>) (9-11).

#### References:

1. Qiao, C.; Gupte, A.; Boshoff, H. I.; Wilson, D. J.; Bennett, E. M.; Somu, R. V.; Barry, C. E., 3rd; Aldrich, C. C., 5'-O-[(N-acyl)sulfamoyl]adenosines as antitubercular agents that inhibit MbtA: an adenylation enzyme required for siderophore biosynthesis of the mycobactins. *J Med Chem* **2007**, *50* (24), 6080-94.
2. Miller KD, Pniewski K, Perry CE, Papp SB, Shaffer JD, Velasco-Silva JN, Casciano JC, Aramburu TM, Srikanth YVV, Cassel J, Skordalakes E, Kossenkov AV, Salvino JM, Schug ZT. (2021) Targeting ACSS2 with a transition-state mimetic inhibits triple-negative breast cancer growth. *Cancer Res.* *81*, 1252-1264.
3. Gorrec F. The MORPHEUS protein crystallization screen. *J Appl Crystallogr.* 2009 Dec 1;42(Pt 6):1035-1042. doi: 10.1107/S0021889809042022. Epub 2009 Nov 7. PMID: 22477774; PMCID: PMC3246824.
4. Kabsch, W. (2010). Xds. *Acta Crystallographica Section D: Biological Crystallography* *66*,125-132.
5. Emsley, P., Lohkamp, B., Scott, W.G. and Cowtan, K. (2010) Features and development of Coot. *Acta Crystallographica Section D: Biological Crystallography* *66*, 486-501.
6. Adams, P.D., Afonine, P.V., Bunkóczi, G., Chen, V.B., Davis, I.W., Echols, N., Headd, J.J., Hung, L.W., Kapral, G.J., Grosse-Kunstleve, R.W. and McCoy, A.J. (2010) PHENIX: a comprehensive Python-based system for macromolecular structure solution. *Acta Crystallographica Section D: Biological Crystallography* *66*, 213-221.
7. Chen, V.B., Arendall, W.B., Headd, J.J., Keedy, D.A., Immormino, R.M., Kapral, G.J., Murray, L.W., Richardson, J.S. and Richardson, D.C. (2010) MolProbity: all-atom structure

- validation for macromolecular crystallography. *Acta Crystallographica Section D: Biological Crystallography* 66, 12-21.
8. Berman, H., Henrick, K. and Nakamura, H. (2003) Announcing the worldwide protein data bank. *Nature Structural & Molecular Biology*, 10, 980-980.
  9. Berman, H.M., Westbrook, J., Feng, Z., Gilliland, G., Bhat, T.N., Weissig, H., Shindyalov, I.N. and Bourne, P.E. (2000) The protein data bank. *Nucleic Acids Research* 28, 235-242.
  10. Grabowski M, Langner KM, Cymborowski M, Porebski PJ, Sroka P, Zheng H, Cooper DR, Zimmerman MD, Elsliger MA, Burley SK, Minor W (2016) A public database of macromolecular diffraction experiments. *Acta crystallographica. Section D, Structural biology* 72 (Pt 11):1181-1193.
  11. Grabowski M, Cymborowski M, Porebski PJ, Osinski T, Shabalin IG, Cooper DR, Minor W (2019) The Integrated Resource for Reproducibility in Macromolecular Crystallography: Experiences of the first four years. *Struct Dyn* 6: 064301.
